# Supplementary material for: A statistical analysis of the global historical volcanic fatalities record
Source: Springer Nature journal article supplement (doi:10.1186/2191-5040-2-2), 2013-02-14

|                                                 | Population<br>(thousands) |
|-------------------------------------------------|---------------------------|
| 1: Arequipa, Peru (El Misti) .....              | 841                       |
| 2: Auckland, New Zealand (Auckland Field) ..... | 418                       |
| 3: Guatemala City, Guatemala (Pacaya) .....     | 994                       |
| 4: Managua, Nicaragua (Masaya) .....            | 973                       |
| 5: México City, México (Nevado de Toluca) ..... | 12,300                    |
| 6: Naples, Italy (Campi Flegrei) .....          | 989                       |
| 7: Pasto, Colombia (Galeras) .....              | 382                       |
| 8: Quito, Ecuador (Guagua Pichincha) .....      | 1,400                     |
| 9: San Salvador, El Salvador (Ilopango) .....   | 526                       |
| 10: Yogyakarta, Indonesia (Merapi) .....        | 637                       |

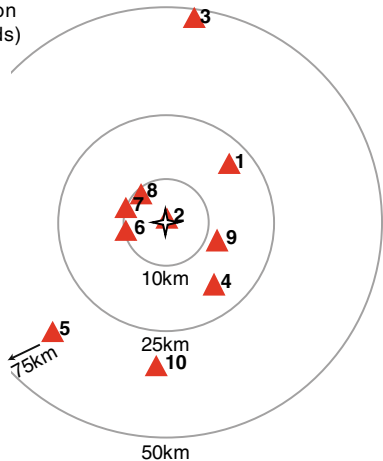

Supplement: 13617_2012_6_MOESM1_ESM.pdf [file 13617_2012_6_MOESM1_ESM.pdf]
