# Supplementary material for: A statistical analysis of the global historical volcanic fatalities record
Source: Springer Nature journal article supplement (doi:10.1186/2191-5040-2-2), 2013-02-14
Supplement: 13617_2012_6_MOESM3_ESM.pdf [file 13617_2012_6_MOESM3_ESM.pdf]

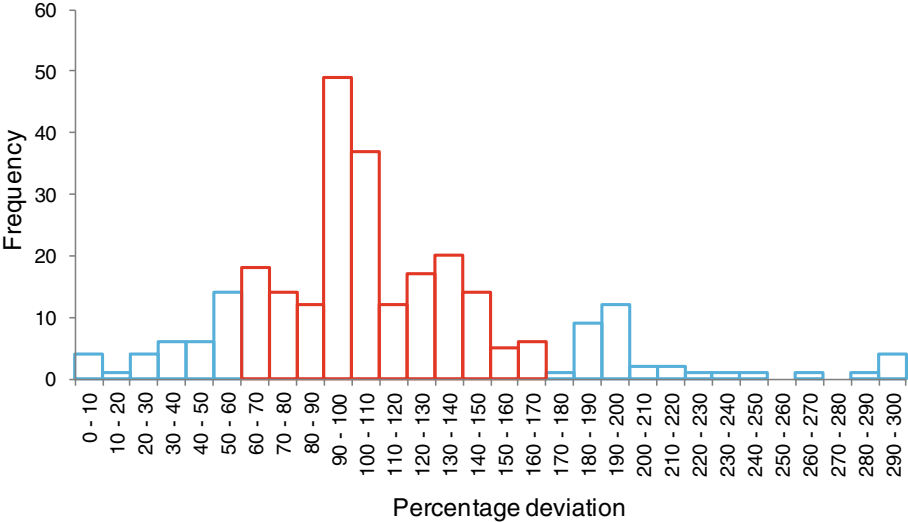

■ Within 1 standard deviation of mean

■ Outside 1 standard deviation of mean
