# Supplementary material for: A statistical analysis of the global historical volcanic fatalities record
Source: Springer Nature journal article supplement (doi:10.1186/2191-5040-2-2), 2013-02-14
Supplement: 13617_2012_6_MOESM5_ESM.pdf [file 13617_2012_6_MOESM5_ESM.pdf]

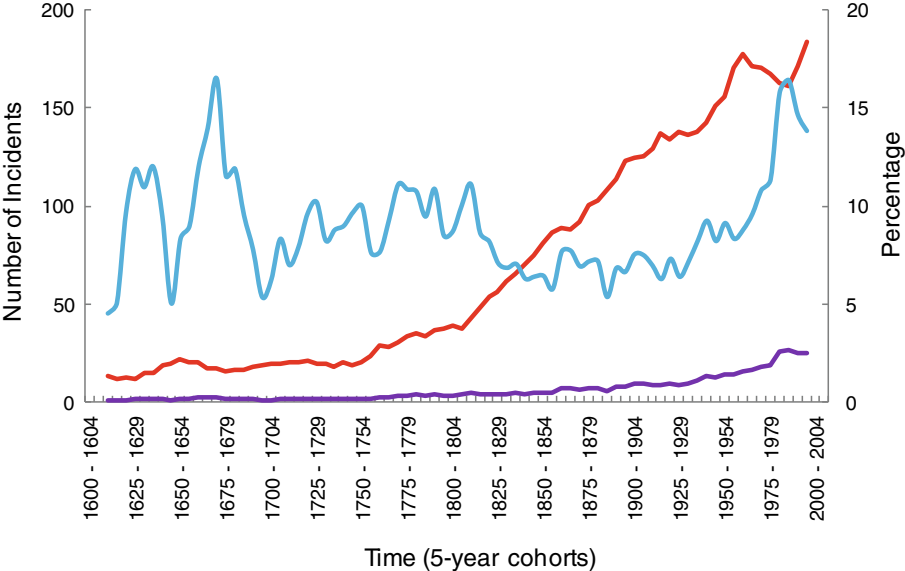

- 25-year moving average number of volcanic events (fatal + non-fatal)
- 25-year moving average number of fatal incidents
- Number of fatal incidents as a percentage of all volcanic events, using 25-year moving average figures
