# Supplementary material for: A statistical analysis of the global historical volcanic fatalities record
Source: Springer Nature journal article supplement (doi:10.1186/2191-5040-2-2), 2013-02-14
Supplement: 13617_2012_6_MOESM6_ESM.pdf [file 13617_2012_6_MOESM6_ESM.pdf]

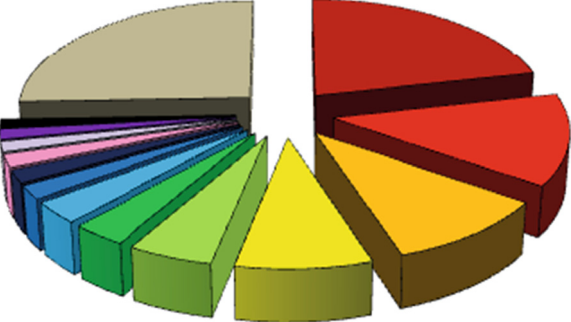

| Fatal Incident                        | Fatalities | %  |
|---------------------------------------|------------|----|
| ■ Tambora, Indonesia (1815)           | 60,000     | 22 |
| ■ Krakatau, Indonesia (1883)          | 36,417     | 13 |
| ■ Pelée, Martinique (1902)            | 28,800     | 10 |
| ■ Nevado del Ruiz, Colombia (1985)    | 23,187     | 8  |
| ■ Unzen, Japan (1792)                 | 14,524     | 5  |
| ■ Grímsvötn, Iceland (1783)           | 9,350      | 3  |
| ■ Santa María, Guatemala (1902)       | 8,700      | 3  |
| ■ Kilauea, Hawaii (1790)              | 5,405      | 2  |
| ■ Kelut, Indonesia (1919)             | 5,088      | 2  |
| ■ Tungurahua, Ecuador (1640)          | 5,000      | 2  |
| ■ Galunggung, Indonesia (1822)        | 4,011      | 2  |
| ■ Vesuvius, Italy (1631)              | 4,000      | 1  |
| ■ Santa María, Guatemala (1929)       | 3,080      | 1  |
| ■ All other incidents (520 incidents) | 71,318     | 26 |
