# Supplementary material for: A statistical analysis of the global historical volcanic fatalities record
Source: Springer Nature journal article supplement (doi:10.1186/2191-5040-2-2), 2013-02-14

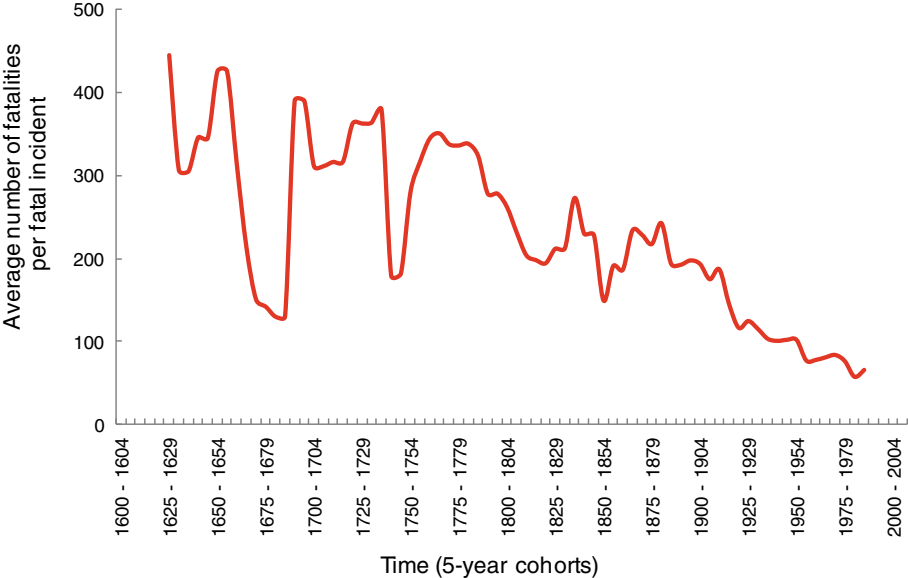

Supplement: 13617_2012_6_MOESM8_ESM.pdf [file 13617_2012_6_MOESM8_ESM.pdf]
