# Supplementary material for: A statistical analysis of the global historical volcanic fatalities record
Source: Springer Nature journal article supplement (doi:10.1186/2191-5040-2-2), 2013-02-14
Supplement: 13617_2012_6_MOESM10_ESM.pdf [file 13617_2012_6_MOESM10_ESM.pdf]

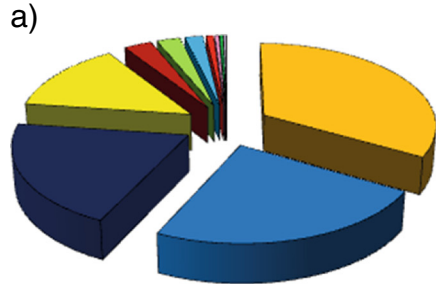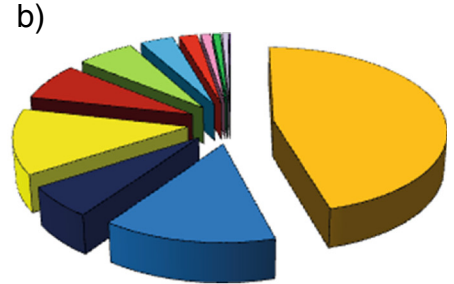

| All Fatal Incidents |      | Largest 5 Disasters Removed               |                              |            |      |
|---------------------|------|-------------------------------------------|------------------------------|------------|------|
| Fatalities          | %    | Hazard                                    |                              | Fatalities | %    |
| 91,484              | 33   | <span style="color: yellow;">■</span>     | Pyroclastic Density Currents | 50,994     | 46   |
| 65,024              | 24   | <span style="color: blue;">■</span>       | Indirect                     | 15,724     | 14   |
| 55,277              | 20   | <span style="color: darkblue;">■</span>   | Waves (Tsunami)              | 6,813      | 6    |
| 37,451              | 14   | <span style="color: orange;">■</span>     | Lahars (Primary)             | 14,054     | 13   |
| 8,126               | 3    | <span style="color: red;">■</span>        | Tephra                       | 8,126      | 7    |
| 6,801               | 3    | <span style="color: lightgreen;">■</span> | Lahars (Secondary)           | 6,801      | 6    |
| 5,230               | 2    | <span style="color: cyan;">■</span>       | Avalanches                   | 3,953      | 3    |
| 2,151               | 0.78 | <span style="color: red;">■</span>        | Gas                          | 2,151      | 2    |
| 1,163               | 0.42 | <span style="color: pink;">■</span>       | Floods (Jökulhlaups)         | 1,163      | 1    |
| 887                 | 0.32 | <span style="color: green;">■</span>      | Lava Flows                   | 887        | 0.79 |
| 765                 | 0.28 | <span style="color: grey;">■</span>       | Seismicity                   | 765        | 0.69 |
| 142                 | 0.05 | <span style="color: purple;">■</span>     | Lightning                    | 142        | 0.13 |
