# Supplementary material for: A statistical analysis of the global historical volcanic fatalities record
Source: Springer Nature journal article supplement (doi:10.1186/2191-5040-2-2), 2013-02-14
Supplement: 13617_2012_6_MOESM13_ESM.pdf [file 13617_2012_6_MOESM13_ESM.pdf]

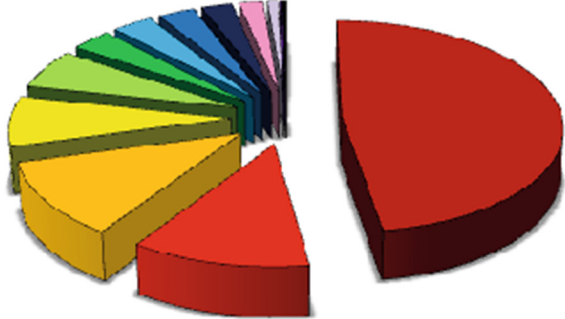

| Region                     | All Fatal Incidents |      |
|----------------------------|---------------------|------|
|                            | Fatalities          | %    |
| Indonesia                  | 132,921             | 48   |
| South America              | 32,476              | 12   |
| West Indies                | 32,019              | 11   |
| Japan                      | 21,214              | 8    |
| Mexico and Central America | 16,813              | 6    |
| Melanesia                  | 9,367               | 3    |
| Iceland                    | 9,364               | 3    |
| Philippines and SE China   | 8,453               | 3    |
| Mediterranean              | 7,011               | 3    |
| Hawaii                     | 5,497               | 2    |
| Africa and Red Sea         | 2,367               | 0.85 |
| Atlantic Ocean             | 741                 | 0.27 |
| New Zealand to Fiji        | 433                 | 0.16 |
| North America              | 94                  | 0.03 |
| Kuril Islands + Kamchatka  | 55                  | 0.02 |
| Indian Ocean               | 38                  | 0.01 |
