# Supplementary material for: A statistical analysis of the global historical volcanic fatalities record
Source: Springer Nature journal article supplement (doi:10.1186/2191-5040-2-2), 2013-02-14
Supplement: 13617_2012_6_MOESM14_ESM.pdf [file 13617_2012_6_MOESM14_ESM.pdf]

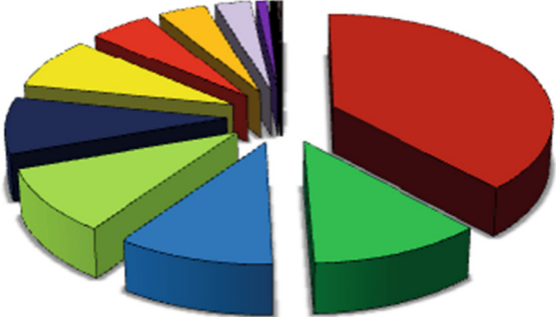

| Region                      | Largest 10 Disasters Removed |      |
|-----------------------------|------------------------------|------|
|                             | Fatalities                   | %    |
| Indonesia                   | 31,416                       | 38   |
| Melanesia                   | 9,367                        | 11   |
| Philippines and SE China    | 8,453                        | 10   |
| Mexico and Central America  | 8,131                        | 10   |
| Mediterranean               | 7,011                        | 9    |
| Japan                       | 6,690                        | 8    |
| South America               | 4,289                        | 5    |
| West Indies                 | 3,219                        | 4    |
| Africa and Red Sea          | 2,367                        | 3    |
| Atlantic Ocean              | 741                          | 0.90 |
| New Zealand to Fiji         | 433                          | 0.53 |
| North America               | 94                           | 0.11 |
| Hawaii                      | 92                           | 0.11 |
| Kuril Islands and Kamchatka | 55                           | 0.07 |
| Indian Ocean                | 38                           | 0.05 |
| Iceland                     | 15                           | 0.02 |
